# Supplementary material for: Silver nanoparticle modified surfaces induce differentiation of mouse kidney-derived stem cells
Source: Royal Society of Chemistry journal article supplement (doi:10.1039/c8ra02145g), 2018-01-01
Supplement: c8ra02145g1.pdf [file c8ra02145g1.pdf]

# Silver nanoparticle modified surfaces induce differentiation of Mouse Kidney-Derived Stem Cells

Neelika Roy Chowdhury<sup>1</sup>, Isabel Hopp<sup>2</sup>, Peter Zilm<sup>3</sup>, Patricia Murray<sup>2\*</sup> and Krasimir Vasilev<sup>1\*</sup>

<sup>1</sup>School of Engineering, University of South Australia, Mawson Lakes–SA 5095

<sup>2</sup>Institute of Translational Medicine, University of Liverpool, Liverpool, U.K

<sup>3</sup>Microbiology laboratory, Adelaide Dental School, The University of Adelaide, Adelaide-SA 5005

\*Corresponding author email addresses: [P.A.Murray@liverpool.ac.uk](mailto:P.A.Murray@liverpool.ac.uk) and [Krasimir.vasilev@unisa.edu.au](mailto:Krasimir.vasilev@unisa.edu.au)

## SUPPORTING INFORMATION

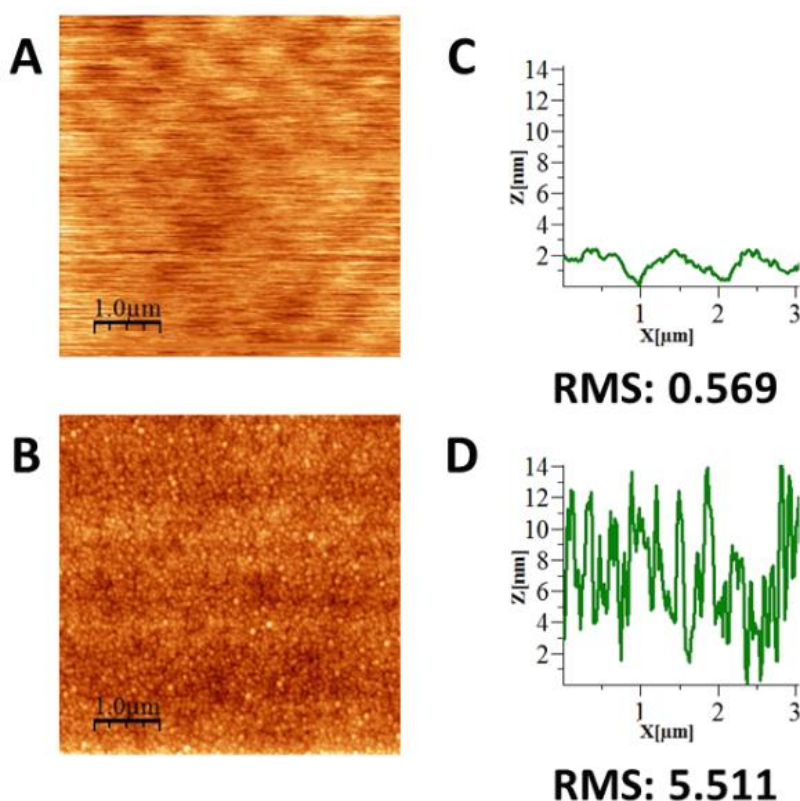

**Figure SI 1** – 2D AFM images of pPOX coated glass coverslips without (A) and with (B) immobilized AgNPs@MSA. RMS roughness of pPOX film before (C) and after (D) silver nanoparticles immobilization

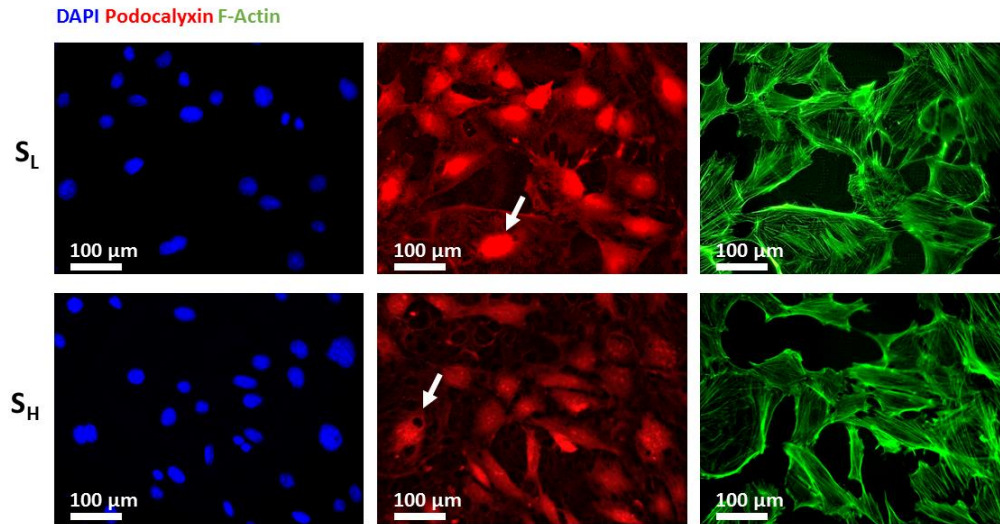

**Figure SI 2** – Mouse kidney stem cells (mKSCs) cultured on silver nanoparticles containing substrates ( $S_L$  and  $S_H$ ) for 96 h express podocyte specific marker podocalyxin (red). Arrowheads indicate presence of podocalyxin expressing binucleate mKSCs. Nuclei were stained with 4',6-diamidino-2-phenylindole dihydrochloride (DAPI) (blue). F-actin were stained with phalloidin (green).
